# Supplementary material for: A renewable HSO3/H2PO3-grafted polyethylene fiber catalyst: an efficient heterogeneous catalyst for the synthesis of 5-hydroxymethylfurfural from fructose in water
Source: Royal Society of Chemistry journal article supplement (doi:10.1039/c3ra43275k), 2013-01-01
Supplement: c3ra43275k.pdf [file c3ra43275k.pdf]

## [Supporting Information]

# A Renewable HSO<sub>3</sub>/H<sub>2</sub>PO<sub>3</sub>-Grafted Polyethylene Fiber Catalyst: An Efficient Heterogeneous Catalyst for the Synthesis of 5-Hydroxymethylfurfural from Fructose in Water

Chengcheng Tian,<sup>a,b</sup> Yatsandra Oyola,<sup>\*b</sup> Kimberly Nelson,<sup>c</sup> Song-Hai Chai,<sup>b</sup> Xiang Zhu,<sup>a,b</sup> J. Chris Bauer,<sup>b</sup> Christopher J. Janke,<sup>d</sup> Suree Brown,<sup>c</sup> Yanglong Guo,<sup>\*a</sup> and Sheng Dai<sup>\*b</sup>

<sup>a</sup> Key Laboratory for Advanced Materials, Research Institute of Industrial Catalysis, East China University of Science and Technology, Shanghai 200237, P.R. China

<sup>b</sup> Chemical Sciences Division, Oak Ridge National Laboratory, Oak Ridge, Tennessee 37831, United States

<sup>c</sup> Department of Chemistry, University of Tennessee–Knoxville, Tennessee 37996-1600, United States

<sup>d</sup> Materials Science and Technology Division, Oak Ridge National Laboratory, Oak Ridge, Tennessee 37831, United States

## Content

### 1. Experimental Section

### 2. Figures

**Figure S1.** FT-IR spectra of (a) PE fiber, HSO<sub>3</sub>-fiber and H<sub>2</sub>PO<sub>3</sub>-fiber and (b) zoomed in the region of H<sub>2</sub>PO<sub>3</sub>-fiber and HSO<sub>3</sub>-fiber focusing on the absorbance of the P=O and –SO<sub>2</sub> groups.

**Figure S2.** <sup>31</sup>P solid-state MAS-NMR spectrum of H<sub>2</sub>PO<sub>3</sub>-fiber.

**Figure S3.** SEM images of (a) (b) PE fiber, (c) (d) HSO<sub>3</sub>-fiber and (e) (f)H<sub>2</sub>PO<sub>3</sub>-fiber.

**Figure S4.** Effects of reaction time on the conversion of fructose to HMF catalyzed by HSO<sub>3</sub>-fiber and H<sub>2</sub>PO<sub>3</sub>-fiber. Dehydration reactions were carried out at 120 °C for different reaction times.

(Reaction conditions: 5.6 % wt fructose, 8.6 % wt catalyst, in H<sub>2</sub>O)

**Figure S5.** Catalytic activity of the reused fiber catalysts for HMF from fructose at 120 °C for 6 h.

(Reaction conditions: 5.6 % wt fructose, 8.6 % wt catalyst, in H<sub>2</sub>O)

**Figure S6.** Effect of reaction time on the yield of Levulinic acid in the dehydration of fructose to HMF catalyzed by HSO<sub>3</sub>-fiber and H<sub>2</sub>PO<sub>3</sub>-fiber. Dehydration reactions were carried out at 120 °C for different reaction times. (Reaction conditions: 5.6 % wt fructose, 8.6 % wt catalyst, in H<sub>2</sub>O)

### 3. Table

**Table S1.** The surface properties of the fresh catalysts.

**Table S2.** The elemental compositions and catalytic performances of the catalysts after being reused for four times.

### 4. References

## 1. Experimental Section

### Preparation of the co-grafting acrylonitrile with vinyl sulfonic acid or vinylphosphonic acid monomers on polyethylene fibers (HSO<sub>3</sub>-fiber and H<sub>2</sub>PO<sub>3</sub>-fiber)

High surface area polyethylene fibers (~0.75 g) were sealed in the double-layered plastic bags previously placed under an inert, N<sub>2</sub>, atmosphere and electron beam irradiated using a RDI Dynamitron electron beam machine, over dry ice using the following parameters: beam energy – 4.9 MeV; beam current – 1.00 mA; approximate total dose – 200 kGy; total irradiation time – about 22 min.

After irradiation, the samples were placed under a nitrogen atmosphere in a glove bag where they were transferred to a solution containing 56.7 mL of DMSO, 162 mL of acrylonitrile and either 55.5 mL vinylsulfonic acid sodium salt with 25% H<sub>2</sub>O or 55.4 mL of vinyl phosphonic acid in a reaction flasks, previously nitrogen degassed for at least 1 h. The fibers in the solution were placed in an oven at 60 °C overnight. The fibers were then filtered and washed with DMF, then rinsed with methanol, dried in a vacuum oven at 50 °C overnight to give an approximated degree of grafting of ~157 % for the HSO<sub>3</sub>-fiber and ~280 % for the H<sub>2</sub>PO<sub>3</sub>-fiber.

$$\% \text{ DOG} = ((\text{wt}_{\text{AG}} - \text{wt}_{\text{BG}}) / \text{wt}_{\text{BG}}) \times 100$$

wt<sub>AG</sub> - dry weight after grafting

wt<sub>BG</sub> - dry weight before grafting

The elemental analysis of the grafted fibers reveals a composition of approximately C 70 %, H 8.8 %, N 15 %, O 2.5 % and S 0.2 % for the grafted HSO<sub>3</sub>-fiber and C 71 %, H 8.1 %, N 16.9 %, O 4.5 % and P 0.24 % for the grafted H<sub>2</sub>PO<sub>3</sub>-fiber. Before using the fibers they were treated with 2.5 % H<sub>2</sub>SO<sub>3</sub>, (~15 mL for every 1.5 mg of grafted fibers) at 80 °C for 1 h and rinsed with deionized water until the pH of the rinsing water was 7.

## Materials Characterization

The grafted PE fiber catalyst was characterized by FT-IR (Bio-Rad Excalibur FTS-3000) after being evenly mixed with KBr powder and the spectrum was recorded over the range from 500 - 3500  $\text{cm}^{-1}$ . The solid state NMR was measured on a Bruker AVANCE 400 spectrometer at 11 kHz. Scanning electron microscope (SEM) experiments were conducted on HITACH HD2000 microscopes with an accelerating voltage of 200 kV. Elemental analysis of the samples was done by EAI-Elemental Analysis Inc. and Galbraith; CHNO analyzed by combustion. Sulfur was determined by titration or combustion and Phosphorus by ICP. The analysis of HMF was carried out by means of a reversed phase HPLC system (Shimadzu CBM-10AW VP) equipped with a C18 column (250 mm  $\times$  4.6 mm  $\times$  5  $\mu\text{m}$ ). The mobile phase was water at a flow rate of 1.0 mL/min and the detection wavelength was 300 nm and the samples were diluted with water. The consumption of fructose was confirmed by the phenol-sulfuric acid method.<sup>[1]</sup> A mixture containing 0.1 mL of the reaction sample (water-soluble portion), 0.9 mL of deionized water, 1 mL of 5% phenol (freshly distilled) and 5 mL of 98% concentrated sulfuric acid was prepared. The analysis was performed on an Evolution 600 UV-vis spectrophotometer at about 490 nm. The concentration of fructose in the reacted solution was calculated based on the standard curve obtained with fructose.

## Adsorption experiments of fructose and HMF for catalyst

0.3 g of each solid acid catalyst was immersed in 3.5 mL of deionized water containing 0.23 g of fructose or 0.1 g of HMF. After shaking for 24 h at room temperature, the mixture was filtered and the supernatant solution was analyzed by UV-vis spectrophotometer and HPLC, while the adsorbed amount can be calculated by subtracting the concentration of equilibrium solution from the initial concentration.

## Catalytic test for dehydration of fructose to HMF

The dehydration of fructose to HMF over the solid acid catalysts was performed in a 50 mL round-bottom flask equipped with a magnetic stirrer containing 8.6 wt % (0.35 g) of catalyst, 5.6

wt % (0.23 g) of fructose, and 3.5 mL of distilled water at 120 °C. Each aliquot of reaction mixture was filtered and the supernatant liquid was analyzed by HPLC based on the standard curve obtained with HMF (external standard method). After each reaction (6 h), the catalyst was collected by filtration, washed with ethanol and 1 M HCl solution for several times to remove any byproduct, then washed to neutral with water and dried. Then another reaction batch started as a new recycle with the used catalyst. This process was repeated for several times, and the catalytic performance in each recycle was recorded.

### **Estimation of Yields of Levulinic Acid**

Mass spectrometry was used to estimate the yields of levulinic acid at reaction times of 3, 6, 10, and 20 h in the experiment for Figure 2a based on the yields of HMF through a semi-quantitative method. Since the yields of HMF were known from HPLC, we used HMF, observed at  $m/z$  127 in positive-ion mode in mass spectrum, as the internal standard to estimate the yield of levulinic acid (observed at  $m/z$  117 in positive-ion mode) in the same reaction mixture. Mass spectrometry was performed using a JEOL (Peabody, MA, USA) orthogonal time-of-flight (TOF) mass spectrometer (model JMS-T100LC) with an IonSense (Danvers, MA, USA) direct analysis in real time (DART) source in positive-ion mode. Helium gas was used for the DART source at a flow rate of 4 L/min and heated to be 300 °C. The mass acquisition range was  $m/z$  100-300 with a spectra recording interval of 0.1 s. Five standards were prepared in aqueous solutions with the varying concentration ratio of levulinic acid to HMF. The concentration of HMF in these five standards was constant (2.5 wt%). Each standard was examined by DART-TOFMS for five times. The average intensity ratio of ions at  $m/z$  117 (levulinic acid) to  $m/z$  127(HMF) was plotted against the concentration ratio of levulinic acid to HMF. The mass spectra of the reaction mixtures taken at 3, 6, 10, and 20 h were analyzed by mass spectrometry in the same manner. Based on the yields of HMF at four different reaction times determined by HPLC, the relative yields of levulinic acid in the reaction mixtures were calculated using the calibration curve and are shown in Figure S6. Clearly, the yield of levulinic acid did not change much after 6 h, suggesting that the further hydration of HMF was indeed restrained.

## 2. Figures

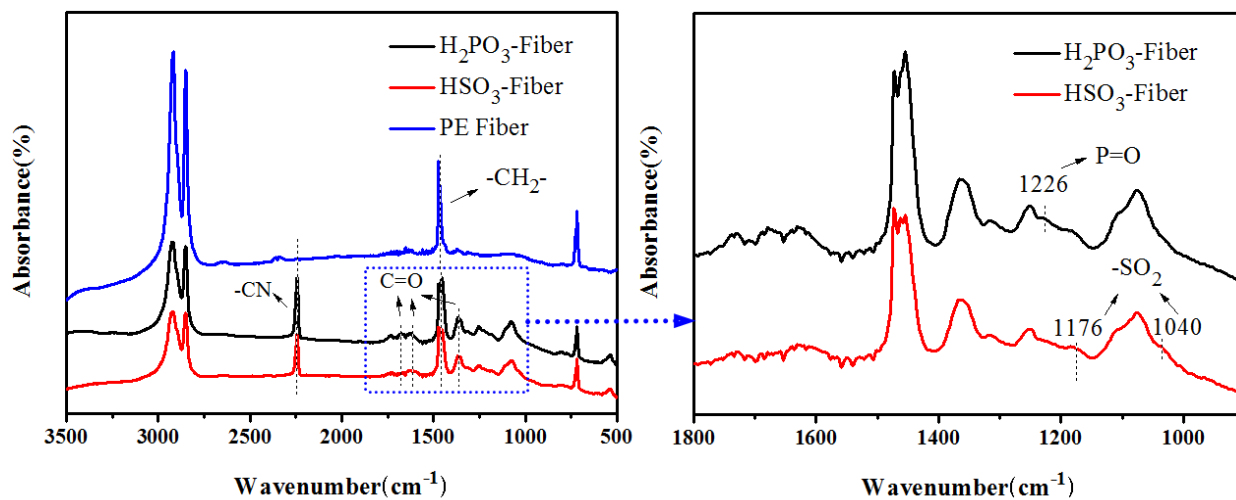

**Figure S1.** FT-IR spectra of (a) PE fiber, H<sub>2</sub>PO<sub>3</sub>-fiber and HSO<sub>3</sub>-fiber and (b) zoomed in the region of H<sub>2</sub>PO<sub>3</sub>-fiber and HSO<sub>3</sub>-fiber focusing on the absorbance of the P=O and -SO<sub>2</sub> groups.

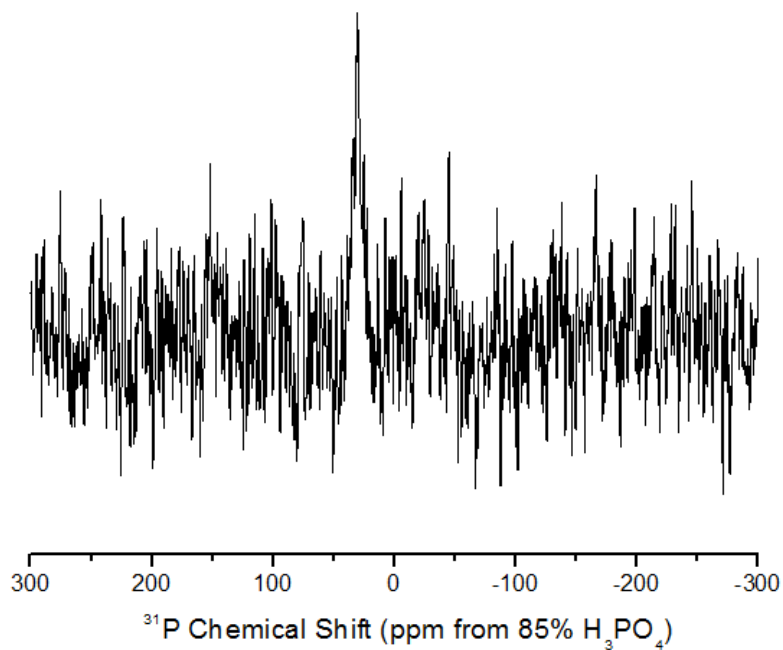

**Figure S2.** <sup>31</sup>P solid-state MAS-NMR spectrum of H<sub>2</sub>PO<sub>3</sub>-fiber.

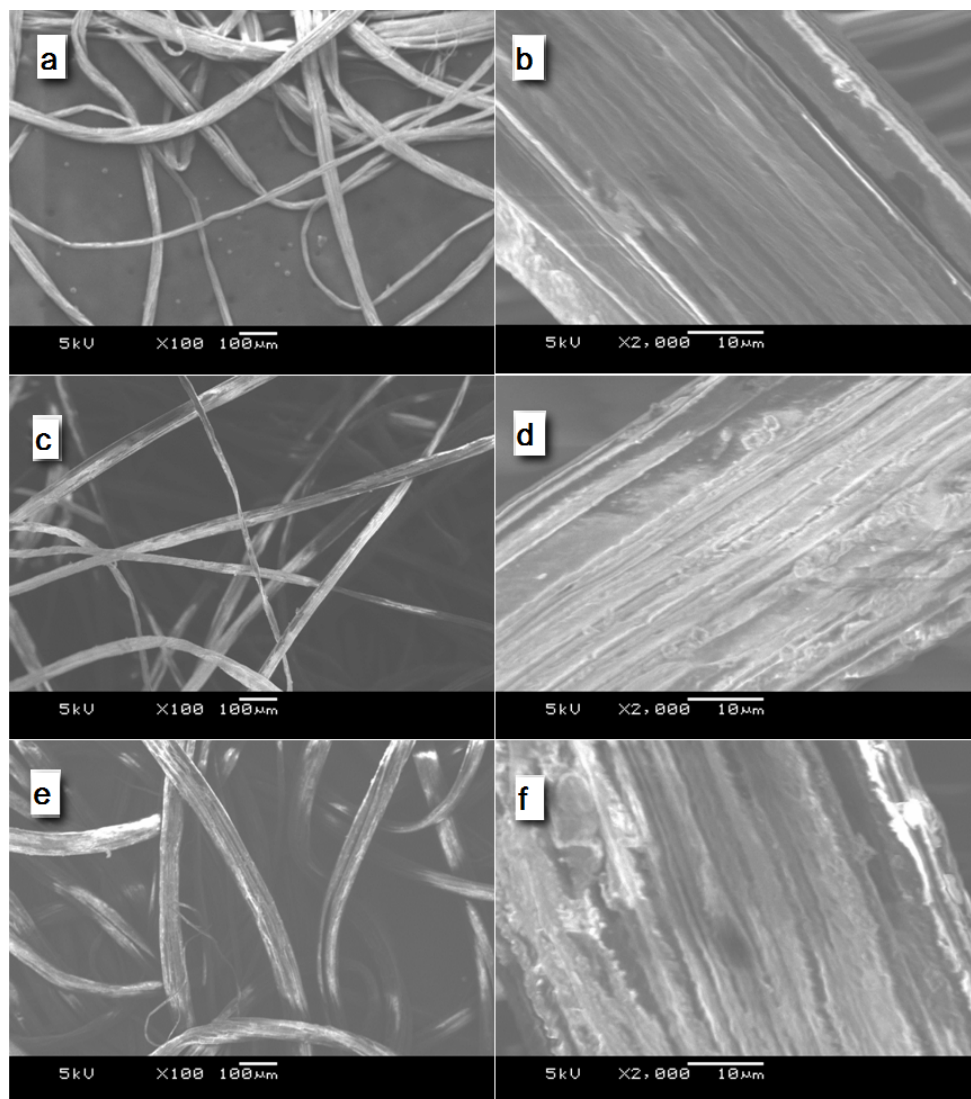

**Figure S3.** SEM images of (a) (b) PE fiber, (c) (d) HSO<sub>3</sub>-fiber and (e) (f)H<sub>2</sub>PO<sub>3</sub>-fiber.

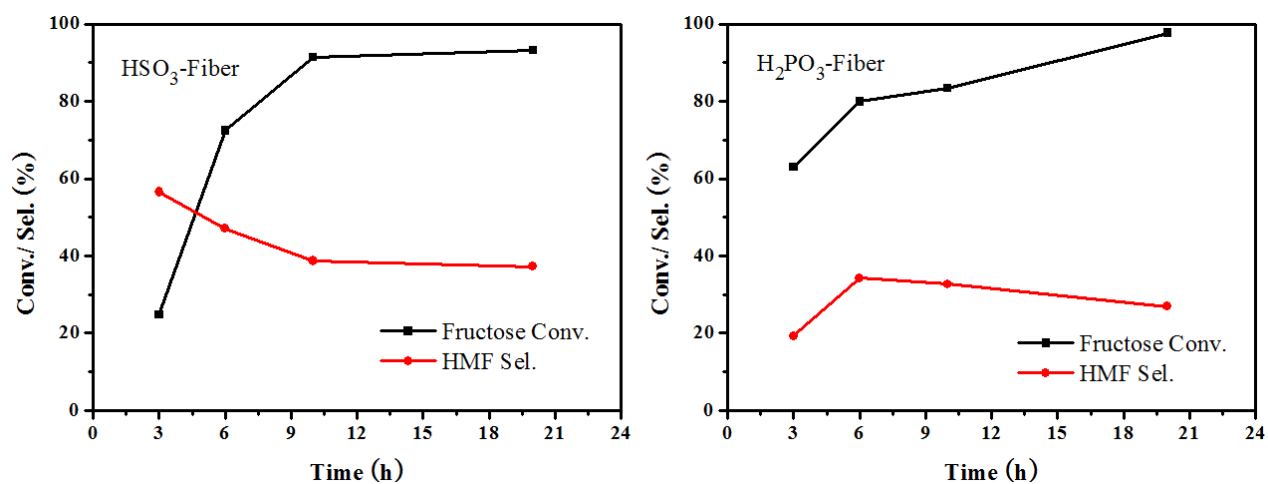

**Figure S4.** Effects of reaction time on the conversion of fructose to HMF catalyzed by HSO<sub>3</sub>-fiber and H<sub>2</sub>PO<sub>3</sub>-fiber. Dehydration reactions were carried out at 120 °C for different reaction times. (Reaction conditions: 5.6 % wt fructose, 8.6 % wt catalyst, in H<sub>2</sub>O)

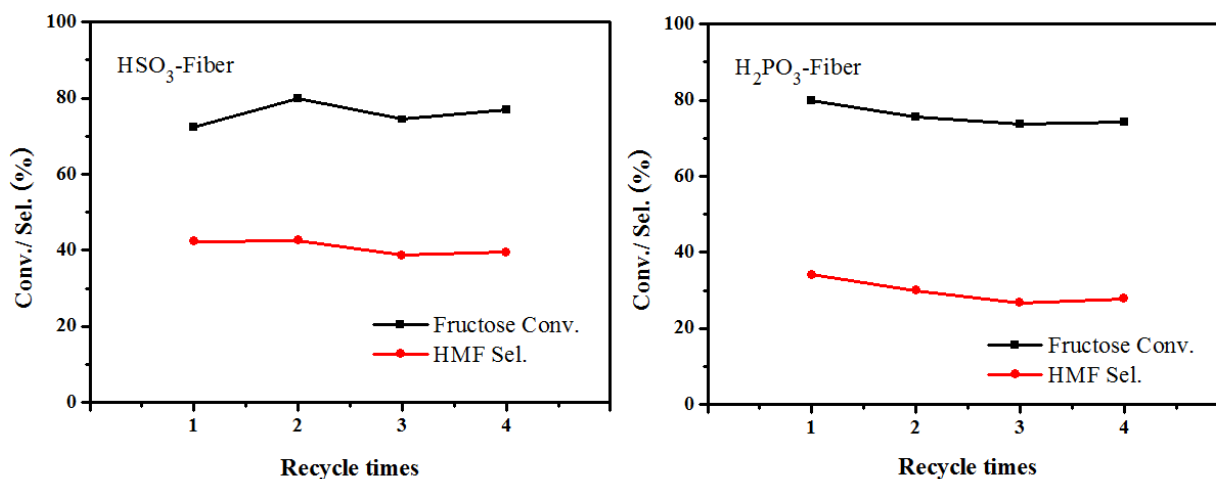

**Figure S5.** Catalytic activity of the reused fiber catalysts for HMF from fructose at 120 °C for 6 h. (Reaction conditions: 5.6 % wt fructose, 8.6 % wt catalyst, in H<sub>2</sub>O)

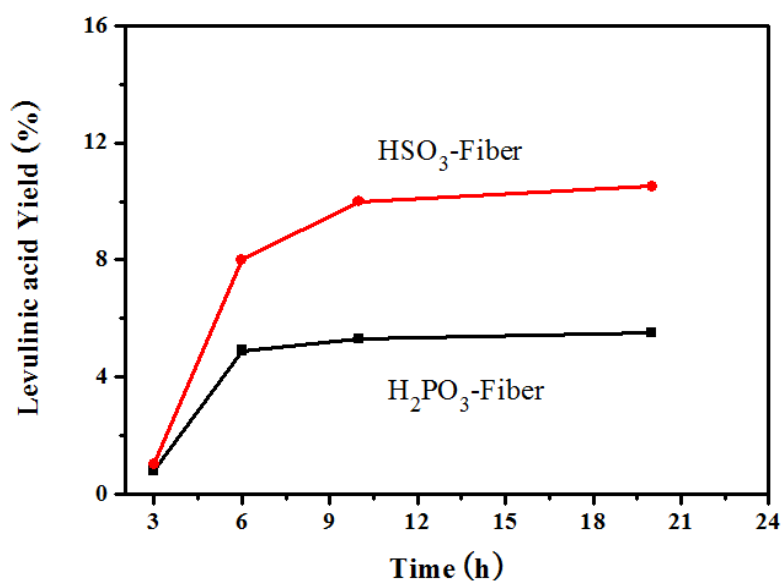

**Figure S6.** Effect of reaction time on the yield of Levulinic acid in the dehydration of fructose to HMF catalyzed by HSO<sub>3</sub>-fiber and H<sub>2</sub>PO<sub>3</sub>-fiber. Dehydration reactions were carried out at 120 °C for different reaction times. (Reaction conditions: 5.6 % wt fructose, 8.6 % wt catalyst, in H<sub>2</sub>O)



### 3. Tables

**Table S1.** The elemental compositions of the fresh catalysts. (Pretreatment method: the sample was dried to constant weight at 80 °C under vacuum, at this point to be held for three hours and then handled under nitrogen)

| Catalyst                              | S<br>(wt%) | P<br>(wt%) | O<br>(wt%) | carboxylic acid<br>density (mmol/g) | sulfonic / phosphonic acid<br>density (mmol/g) |
|---------------------------------------|------------|------------|------------|-------------------------------------|------------------------------------------------|
| HSO <sub>3</sub> -fiber               | 0.20       |            | 2.97       | 0.83                                | 0.063                                          |
| H <sub>2</sub> PO <sub>3</sub> -fiber |            | 0.19       | 4.54       | 1.32                                | 0.061                                          |

**Table S2.** The elemental compositions (Pretreatment method: the sample was washed by ethanol and water several times and dried to constant weight at 80 °C under vacuum, at this point to be held for three hours and then handled under nitrogen) and catalytic performances of the catalysts after being reused for four times.

| Catalyst                              | S<br>(wt%) | P<br>(wt%) | O<br>(wt%) | carboxylic acid<br>density (mmol/g) | HMF yield<br>(%) |
|---------------------------------------|------------|------------|------------|-------------------------------------|------------------|
| HSO <sub>3</sub> -fiber               | 0.20       |            | 2.97       | 0.83                                | 30               |
| H <sub>2</sub> PO <sub>3</sub> -fiber |            | 0.19       | 4.55       | 1.32                                | 21               |

### 4. References

[1] Dubois, M.; Gilles, K. A.; Hamilton, J. K.; Rebers, P. A.; Smith, F. *Anal. Chem.* **1956**, *28*, 350–356.
